# Supplementary material
Source: publisher figshare collection journal article supplement (https://sage.figshare.com/ndownloader/files/21904254)
Supplement: Supplementary file 1 [file 21904254]

## Sheet: Matrix of Urban Form Characters
Category	Definition	Character
		Name			Scale of grain		Reference
		Index		Element		Scale of extent
Dimension	the basic geometrical dimensions of individual objects	Area	of	Block	S	S	Dibble et al. (2017)
Dimension		Built-up area		Block	S	S	Gil (2012)
Dimension		Depth		Block	S	S	Sevtsuk (2016)
Dimension		Gross floor area		Block	S	S	Gil (2012)
Dimension		Height		Block	S	S	Hermosilla (2014)
Dimension		Layers (number of floors)		Block	S	S	Gil (2012)
Dimension		Length		Block	S	S	Gil (2012)
Dimension		Longest Diagonal		Block	S	S	Feliciotti (2018)
Dimension		Perimeter		Block	S	S	Gil (2012)
Dimension		Private space area		Block	S	S	Gil (2012)
Dimension		Public space area		Block	S	S	Gil (2012)
Dimension		Volume		Block	S	S	Hermosilla (2014)
Dimension		Width		Block	S	S	Gil (2012)
Dimension		Area		Building	S	S	Colaninno, Cladera and Pfeffer (2011)
Dimension		Bounding box Area		Building	S	S	Hamaina, Leduc and Moreau (2012)
Dimension		Core Area Index		Building	S	S	Colaninno, Cladera and Pfeffer (2011)
Dimension		Floor area		Building	S	S	Schirmer and Axhausen (2015)
Dimension		Height		Building	S	S	Berghauser Pont, M. et al. (2017)
Dimension		Influence zone area		Building	S	S	Schirmer and Axhausen (2015)
Dimension		Length		Building	S	S	Hamaina, Leduc and Moreau (2012)
Dimension		Length fo centrelines		Building	S	S	Schirmer and Axhausen (2015)
Dimension		Number of floors		Building	S	S	Ye and van Nes (2014)
Dimension		Number of stories		Building	S	S	Schirmer and Axhausen (2015)
Dimension		Volume		Building	S	S	Hamaina, Leduc and Moreau (2012)
Dimension		Width		Building	S	S	Hamaina, Leduc and Moreau (2012)
Dimension		Weighted Average Height		Buildings in Block	S	S	Dibble et al. (2017)
Dimension		Weighted Height		Built Fronts	S	S	Dibble et al. (2017)
Dimension		Bounding box Area		Composite	S	S	Schirmer and Axhausen (2015)
Dimension		Bounding box Length		Composite	S	S	Schirmer and Axhausen (2015)
Dimension		Bounding box Perimeter		Composite	S	S	Schirmer and Axhausen (2015)
Dimension		Bounding box Width		Composite	S	S	Schirmer and Axhausen (2015)
Dimension		Convex Hull Area		Composite	S	S	Schirmer and Axhausen (2015)
Dimension		Convex Hull Perimeter		Composite	S	S	Schirmer and Axhausen (2015)
Dimension		Enclosing circle Area		Composite	S	S	Schirmer and Axhausen (2015)
Dimension		Enclosing circle Perimeter		Composite	S	S	Schirmer and Axhausen (2015)
Dimension		Enclosing circle Radius		Composite	S	S	Schirmer and Axhausen (2015)
Dimension		Perimeter		Composite	S	S	Schirmer and Axhausen (2015)
Dimension		Width along centerline		Composite	S	S	Schirmer and Axhausen (2015)
Dimension		Convex Hull Area		Courtyard	S	S	Schirmer and Axhausen (2015)
Dimension		Depth		Mean Maximum Gravity block	S	S	Sevtsuk (2016)
Dimension		Widht		Mean Maximum Gravity block	S	S	Sevtsuk (2016)
Dimension		Width		Open space	S	S	Araldi and Fusco (2019)
Dimension		Area		Patch	S	S	Vanderhaegen and Canters (2017)
Dimension		Edge length		Patch	S	S	Vanderhaegen and Canters (2017)
Dimension		Perimeter		Patch	S	S	Vanderhaegen and Canters (2017)
Dimension		Area		Plot	S	S	Dibble et al. (2017)
Dimension		Depth		Plot	S	S	Song and Knaap (2007)
Dimension		Extension on Street Front		Plot	S	S	Dibble et al. (2017)
Dimension		Height		Street	S	S	Sevtsuk (2016)
Dimension		Length		Street	S	S	Dibble et al. (2017)
Dimension		Width		Street	S	S	Dibble et al. (2017)
Dimension		Length		Street front	S	S	Schirmer and Axhausen (2015)
Dimension		Length		Street segment	S	S	Bourdic, Salat and Nowacki (2012)
Dimension		Slope		Surface	S	S	Araldi and Fusco (2019)
Dimension		Area		Urban block related street area (UBRSA)	S	S	Hermosilla (2014)
Dimension		Area		Voronoi cell	S	S	Hamaina, Leduc and Moreau (2012)
Dimension		Median Area		Blocks in buffer area	M	M	Song and Knaap (2007)
Dimension		Median Perimeter		Blocks in neighborhood	M	M	Lowry and Lowry (2014)
Dimension		Mesh size		Grid network	M	M	Siksna (1997)
Dimension		Median Area		Plots in neighborhood	M	M	Lowry and Lowry (2014)
Dimension		Area		Sanctuary Area	M	M	Dibble et al. (2017)
Dimension		Cul-de-sac Length		Street network	M	M	Lowry and Lowry (2014)
Dimension		Length		Street network	M	M	Song and Knaap (2007)
Dimension		Length within radius		Street network	M	M	Krizek (2003)
Dimension		Actual Nonresidential Area		Study area	M	M	Song and Knaap (2004)
Dimension		Zoned nonresidential Area		Study area	M	M	Song and Knaap (2004)
Dimension		Area		Patch	L	L	Pham (2011)
Dimension		Length		Street network	L	L	Khirfan (2011)
Dimension		Area		Study area	L	L	Khirfan (2011)
Dimension		Length		Cul-de-sac	L/M	L/M	Song and Knaap (2003)
Dimension		Effective Mesh size		Plot	L/M	L/M	Hausleitner, B. and Berghauser Pont, M. (2017)
Dimension		Diameter		Street network	L/M	L/M	Boeing (2018b)
Dimension		Length		Street network	L/M	L/M	Boeing (2018a)
Shape	the mathematical features of geometrical dimensions of individual objects	Area perimeter ratio	of	Block	S	S	Gil (2012)
Shape		Compactness index		Block	S	S	Dibble et al. (2017)
Shape		Contour stretch Length		Block	S	S	Vanderhaegen and Canters (2017)
Shape		Fractal Dimension		Block	S	S	Hermosilla (2014)
Shape		Fragmentation		Block	S	S	Feliciotti (2018)
Shape		Length / width Proportion		Block	S	S	Gil (2012)
Shape		Length of Radial profile radial stretch		Block	S	S	Vanderhaegen and Canters (2017)
Shape		Normalise nr of perimeter alterations		Block	S	S	Vanderhaegen and Canters (2017)
Shape		Normalised nr of radial alterations		Block	S	S	Vanderhaegen and Canters (2017)
Shape		Normalised number of contour alterations		Block	S	S	Vanderhaegen and Canters (2017)
Shape		Percentage of countours		Block	S	S	Vanderhaegen and Canters (2017)
Shape		Percentage of perimeter		Block	S	S	Vanderhaegen and Canters (2017)
Shape		Percentage of radials of radial progfile		Block	S	S	Vanderhaegen and Canters (2017)
Shape		Rectangularity index		Block	S	S	Dibble et al. (2017)
Shape		Shape factor		Block	S	S	Louf and Barthelemy (2014)
Shape		Shape index		Block	S	S	Hermosilla (2014)
Shape		Area/Covex hull ratio		Building	S	S	Steiniger (2008)
Shape		Area/perimeter ratio		Building	S	S	Colaninno, Cladera and Pfeffer (2011)
Shape		Compactness		Building	S	S	Schirmer and Axhausen (2015)
Shape		Corners to centroid distance		Building	S	S	Schirmer and Axhausen (2015)
Shape		Elongation		Building	S	S	Steiniger (2008)
Shape		Form factor		Building	S	S	Bourdic, Salat and Nowacki (2012)
Shape		Generalised width/height		Building	S	S	Hamaina, Leduc and Moreau (2012)
Shape		Lines in skeleton only connected to one side		Building	S	S	Schirmer and Axhausen (2015)
Shape		Number of centreline orientations		Building	S	S	Schirmer and Axhausen (2015)
Shape		Number of centrelines		Building	S	S	Schirmer and Axhausen (2015)
Shape		Number of corners		Building	S	S	Steiniger (2008)
Shape		Shape		Building	S	S	Steiniger (2008)
Shape		Shape index I		Building	S	S	Colaninno, Cladera and Pfeffer (2011)
Shape		Shape index II		Building	S	S	Colaninno, Cladera and Pfeffer (2011)
Shape		Size factor		Building	S	S	Bourdic, Salat and Nowacki (2012)
Shape		Squareness		Building	S	S	Steiniger (2008)
Shape		Surface area/footprint		Building	S	S	Yoshida and Omae (2005)
Shape		Surface area/volume		Building	S	S	Yoshida and Omae (2005)
Shape		Volume/footprint		Building	S	S	Yoshida and Omae (2005)
Shape		Volumetric compactness		Building	S	S	Bourdic, Salat and Nowacki (2012)
Shape		Area/bounding box ratio		Composite	S	S	Schirmer and Axhausen (2015)
Shape		Area/Covex hull ratio		Composite	S	S	Schirmer and Axhausen (2015)
Shape		Area/Enclosing circle ratio		Composite	S	S	Schirmer and Axhausen (2015)
Shape		Courtyard area/area ratio		Composite	S	S	Schirmer and Axhausen (2015)
Shape		Number of wings		Composite	S	S	Schirmer and Axhausen (2015)
Shape		Perimeter/bounding box ratio		Composite	S	S	Schirmer and Axhausen (2015)
Shape		Perimeter/Convex hull perimeter ratio		Composite	S	S	Schirmer and Axhausen (2015)
Shape		Volume to façade ratio		Composite	S	S	Schirmer and Axhausen (2015)
Shape		Width to length ratio of bounding box		Composite	S	S	Schirmer and Axhausen (2015)
Shape		Height/width ratio		open space	S	S	Araldi and Fusco (2019)
Shape		Area weighted fractal dimension		Patch	S	S	Vanderhaegen and Canters (2017)
Shape		Area weighted shape index		Patch	S	S	Vanderhaegen and Canters (2017)
Shape		Edge density		Patch	S	S	Vanderhaegen and Canters (2017)
Shape		Fractal Dimension		Patch	S	S	Vanderhaegen and Canters (2017)
Shape		Perimeter/area ratio		Patch	S	S	Vanderhaegen and Canters (2017)
Shape		Shape index		Patch	S	S	Vanderhaegen and Canters (2017)
Shape		Compactness		Plot	S	S	Bobkova, Marcus and Berghauser Pont (2017)
Shape		Compactness index		Plot	S	S	Dibble et al. (2017)
Shape		Degree of openness		Plot	S	S	Bobkova, Marcus and Berghauser Pont (2017)
Shape		Plot frontage/depth		Plot	S	S	Sevtsuk (2016)
Shape		Rectangularity index		Plot	S	S	Dibble et al. (2017)
Shape		Fractal Dimension		Skyline	S	S	Cooper (2003)
Shape		Acclivity		Street	S	S	Araldi and Fusco (2019)
Shape		Corridor effect		Street	S	S	Araldi and Fusco (2019)
Shape		Height to width ratio		Street	S	S	Oliveira (2013)
Shape		Fractal Dimension		Street edge	S	S	Cooper (2005)
Shape		Linearity/Windingness		Street segment	S	S	Araldi and Fusco (2019)
Shape		Fractal Dimension		Axial map	M	M	Ariza-Villaverde et al. (2013)
Shape		Perimenter Shape index		Neighborhood	M	M	Song and Popkin (2013)
Shape		Perimeter Mean Fractal Dimension Index		Neighborhood	M	M	Song and Popkin (2013)
Shape		Perimeter-area fractal dimension		Neighborhood	M	M	Song and Popkin (2013)
Shape		Edge density		Built-up area	L	L	Seto and Fragkias (2005)
Shape		Fractal based scaling behaviour curve		Built-up area	L	L	Thomas (2010)
Shape		Fractal Dimension		Built-up area	L	L	Gielen (2017)
Shape		Shape complexity		Built-up area	L	L	Seto and Fragkias (2005)
Shape		Shape index		Built-up area	L	L	Gielen (2017)
Shape		Area weighted mean fractal dimension		Patch	L	L	Pham (2011)
Shape		Edge density		Patch	L	L	Pham (2011)
Shape		Fractal Dimension		Urban edge	L	L	Batty and Longley (1987)
Shape		Box-counting fractal dimension		Built-up area	L/M	L/M	Boeing (2018b)
Shape		Hausdorff fractal dimension		Built-up area	L/M	L/M	Boeing (2018b)
Shape		Circuity		Street segment	L/M	L/M	Boeing (2018a)
Distribution	the spatial distribution of objects in space and their reciprocal positioning	Built Front Ratio	of	Block	S	S	Dibble et al. (2017)
Distribution		Closeness		Block	S	S	Schirmer and Axhausen (2015)
Distribution		Neighboring blocks		Block	S	S	Hermosilla (2014)
Distribution		Openess		Block	S	S	Hausleitner, B. and Berghauser Pont, M. (2017)
Distribution		Orientation		Block	S	S	Gil (2012)
Distribution		Permeability		Block	S	S	Schirmer and Axhausen (2015)
Distribution		Solar orientation		Block	S	S	Gil (2012)
Distribution		Corner position		Building	S	S	Schirmer and Axhausen (2015)
Distribution		Orientation		Building	S	S	Schirmer and Axhausen (2015)
Distribution		Street Distance		Building	S	S	Schirmer and Axhausen (2015)
Distribution		Alignment		Buildings	S	S	Oliveira (2013)
Distribution		Angle betweeen buildings		Buildings	S	S	Hijazi (2016)
Distribution		Distance betweeen buildings		Buildings	S	S	Hamaina, Leduc and Moreau (2012)
Distribution		Party-walls ratio		Buildings	S	S	Hamaina, Leduc and Moreau (2012)
Distribution		Ground openess		Open space	S	S	Hamaina, Leduc and Moreau (2012)
Distribution		Sky openess		Open space	S	S	Hamaina, Leduc and Moreau (2012)
Distribution		Cul-de-sac presence		Plot	S	S	Song and Knaap (2003)
Distribution		Adjacency		Building	M	M	Vanderhaegen and Canters (2017)
Distribution		Proximity		Building	M	M	Colaninno, Cladera and Pfeffer (2011)
Distribution		Fragmentation degree		Built-up area	L	L	Gielen (2017)
Distribution		Index of concentration		Built-up area	L	L	Gielen (2017)
Distribution		Euclidean nearest neighbour distance		Patches	L	L	Pham (2011)
Distribution		Minimum spanning tree Inter-building distance		Building	L/M	L/M	Caruso, Hilal and Thomas (2017)
Distribution		Clustering		Built-up area	L/M	L/M	Galster (2001)
Distribution		Continuity		Built-up area	L/M	L/M	Galster (2001)
Distribution		Nuclearity		Built-up area	L/M	L/M	Galster (2001)
Distribution		Concentration		Housing units	L/M	L/M	Galster (2001)
Intensity	the intensity of space occupation, referring to the density of elements within a set context	Building coverage area	of	Block	S	S	Hermosilla (2014)
Intensity		Covered Area Ratio		Block	S	S	Dibble et al. (2017)
Intensity		Floor Area Ratio		Block	S	S	Dibble et al. (2017)
Intensity		Internal Plot Ratio		Block	S	S	Dibble et al. (2017)
Intensity		Internal Ways Ratio		Block	S	S	Dibble et al. (2017)
Intensity		Normalised built-up volume		Block	S	S	Hermosilla (2014)
Intensity		Normalised number of plots		Block	S	S	Hausleitner, B. and Berghauser Pont, M. (2017)
Intensity		Number of buildings		Block	S	S	Gil (2012)
Intensity		Number of courtyards		Block	S	S	Schirmer and Axhausen (2015)
Intensity		Number of plots		Block	S	S	Dibble et al. (2017)
Intensity		Open Space Ratio		Block	S	S	Dibble et al. (2017)
Intensity		Open space ratio		Block	S	S	Gil (2012)
Intensity		Regular Plot Ratio		Block	S	S	Dibble et al. (2017)
Intensity		Volume/UBRSA area ratio		Block	S	S	Hermosilla (2014)
Intensity		Number of plots		Block frontage	S	S	Sevtsuk (2016)
Intensity		Active Fronts to All Fronts Ratio		Building	S	S	Dibble et al. (2017)
Intensity		Active Fronts to Built Fronts Ratio		Building	S	S	Dibble et al. (2017)
Intensity		Building area to buffer area ratio		Building	S	S	Steiniger (2008)
Intensity		Building area/Influence zone area ratio		Building	S	S	Schirmer and Axhausen (2015)
Intensity		Buildings area to buffer area		Building	S	S	Colaninno, Cladera and Pfeffer (2011)
Intensity		Frequency		Building	S	S	Hallowell (2013)
Intensity		Contiguity		Buildings	S	S	Araldi and Fusco (2019)
Intensity		Covered Area Ratio		Composite	S	S	Schirmer and Axhausen (2015)
Intensity		Number of courtyards		Composite	S	S	Schirmer and Axhausen (2015)
Intensity		Coverage ratio		Patch	S	S	Vanderhaegen and Canters (2017)
Intensity		Density		Patch	S	S	Vanderhaegen and Canters (2017)
Intensity		Floor Space Index		Plot	S	S	Berghauser Pont, M. and Olsson J. (2017)
Intensity		Ground Space Index		Plot	S	S	Berghauser Pont, M. and Olsson J. (2017)
Intensity		Use ratio		Plot	S	S	Dibble et al. (2017)
Intensity		Coverage ratio		Projected area	S	S	Yoshida and Omae (2005)
Intensity		Coverage ratio		Proximity band	S	S	Araldi and Fusco (2019)
Intensity		Frequency of buildings		Proximity band	S	S	Araldi and Fusco (2019)
Intensity		Plot Fragmentation		Proximity band	S	S	Araldi and Fusco (2019)
Intensity		Prevalence of building type		Proximity band	S	S	Araldi and Fusco (2019)
Intensity		Normalised number of plots		Street edge	S	S	Feliciotti (2018)
Intensity		Floor Space Index		Tessellation cell	S	S	Hamaina, Leduc and Moreau (2012)
Intensity		Ground Space Index		Tessellation cell	S	S	Hamaina, Leduc and Moreau (2012)
Intensity		Buildings/UBRSA ratio		Urban block related street area	S	S	Hermosilla (2014)
Intensity		Number of buildings		2 minutes driving distance	S	M	Schirmer and Axhausen (2015)
Intensity		Number of deadends		2 minutes driving distance	S	M	Schirmer and Axhausen (2015)
Intensity		Number of intersections		2 minutes driving distance	S	M	Schirmer and Axhausen (2015)
Intensity		Total floorspace		2 minutes driving distance	S	M	Schirmer and Axhausen (2015)
Intensity		Total length of network		2 minutes driving distance	S	M	Schirmer and Axhausen (2015)
Intensity		Number of plots		Accessible radius	S	M	Bobkova, Marcus and Berghauser Pont (2017)
Intensity		Number of plots		Accessible radius	S	M	Marcus, Berghauser Pont and Bobkova (2017)
Intensity		Spatial attraction of plot		Accessible radius	S	M	Marcus, Berghauser Pont and Bobkova (2017)
Intensity		Total floorspace		Accessible radius	S	M	Marcus, Berghauser Pont and Bobkova (2017)
Intensity		Total open space area		Accessible radius	S	M	Hausleitner, B. and Berghauser Pont, M. (2017)
Intensity		Number of cul-de-sacs		Buffer area	S	M	Song and Popkin (2013)
Intensity		Number of intersections		Buffer area	S	M	Song and Knaap (2007)
Intensity		Number of single-family plots		Buffer area	S	M	Song and Knaap (2007)
Intensity		Proportion of road types		Buffer area	S	M	Song and Popkin (2013)
Intensity		Total open space area		Buffer area	S	M	Song and Knaap (2007)
Intensity		Tree canopy area		Buffer area	S	M	Song and Knaap (2007)
Intensity		Built-up area		Buffer area (100-500m)	S	M	Schirmer and Axhausen (2015)
Intensity		Number of buildings		Buffer area (100-500m)	S	M	Schirmer and Axhausen (2015)
Intensity		Number of deadends		Buffer area (100-500m)	S	M	Schirmer and Axhausen (2015)
Intensity		Number of intersections		Buffer area (100-500m)	S	M	Schirmer and Axhausen (2015)
Intensity		Total floorspace		Buffer area (100-500m)	S	M	Schirmer and Axhausen (2015)
Intensity		Total length of network		Buffer area (100-500m)	S	M	Schirmer and Axhausen (2015)
Intensity		Normalised number of housing units		Neighborhood	M	M	Lowry and Lowry (2014)
Intensity		Number of blocks		Neighborhood	M	M	Song and Knaap (2003)
Intensity		Number of blocks		Neighborhood	M	M	Song and Knaap (2004)
Intensity		Number of intersections		Neighborhood	M	M	Song and Popkin (2013)
Intensity		Normalised floor space area		Sanctuary Area	M	M	Dibble et al. (2017)
Intensity		Normalised length of streets		Sanctuary Area	M	M	Feliciotti (2018)
Intensity		Normalised number of blocks		Sanctuary Area	M	M	Feliciotti (2018)
Intensity		Normalised number of intersections		Sanctuary Area	M	M	Feliciotti (2018)
Intensity		Number of internal streets		Sanctuary Area	M	M	Dibble et al. (2017)
Intensity		Cul-de-sacs to streets ratio		Street network	M	M	Lowry and Lowry (2014)
Intensity		Ingress/ Egress Ratio		Street network	M	M	Dibble et al. (2017)
Intensity		Node degree		Street network	M	M	Feliciotti (2018)
Intensity		Normalised length		Street network	M	M	Dibble et al. (2017)
Intensity		Weighted intersection density		Street network	M	M	Dibble et al. (2017)
Intensity		Strong Grid Pattern Ratio		Street network/Block	M	M	Dibble et al. (2017)
Intensity		Weak Grid Pattern Ratio		Street network/Block	M	M	Dibble et al. (2017)
Intensity		Normalised number of plots		Street	S	M/S	Dibble et al. (2017)
Intensity		Continuity		Built-up area	L	L	Gielen (2017)
Intensity		Discontinuous surface		Built-up area	L	L	Gielen (2017)
Intensity		Housing-normalised open space area		Built-up area	L	L	Gielen (2017)
Intensity		Normalised floor space area		Built-up area	L	L	Gielen (2017)
Intensity		Number of segments		Street network	L	L	Khirfan (2011)
Intensity		Normalised length of streets network		800m-side square	S	L/M	Berghauser Pont, M. and Olsson J. (2017)
Intensity		Normalised length of streets network		800m-side square	S	L/M	Hausleitner, B. and Berghauser Pont, M. (2017)
Intensity		Coefficient of land occupancy		Case study	L/M	L/M	Bourdic, Salat and Nowacki (2012)
Intensity		Normalised area of pedestrian and bicycle paths		Case study	L/M	L/M	Bourdic, Salat and Nowacki (2012)
Intensity		Normalised area of roads		Case study	L/M	L/M	Bourdic, Salat and Nowacki (2012)
Intensity		Normalised built-up area		Case study	L/M	L/M	Ye and van Nes (2014)
Intensity		Normalised floor space area		Case study	L/M	L/M	Bourdic, Salat and Nowacki (2012)
Intensity		Normalised green space area		Case study	L/M	L/M	Bourdic, Salat and Nowacki (2012)
Intensity		Normalised number of housing units		Case study	L/M	L/M	Bourdic, Salat and Nowacki (2012)
Intensity		Normalised number of plots		Case study	L/M	L/M	Bourdic, Salat and Nowacki (2012)
Intensity		Number of Segments		Minimum spanning tree	L/M	L/M	Caruso, Hilal and Thomas (2017)
Intensity		Normalised green space area		Neighborhood	L/M	L/M	Lai et al. (2018)
Intensity		Normalised length of streets		Neighborhood	L/M	L/M	Lai et al. (2018)
Intensity		Normalised number of intersections		Pedestrian network	L/M	L/M	Bourdic, Salat and Nowacki (2012)
Intensity		Normalised number of intersections		Road network	L/M	L/M	Bourdic, Salat and Nowacki (2012)
Intensity		Proportion dedicated to public transport		Road network	L/M	L/M	Bourdic, Salat and Nowacki (2012)
Intensity		Average node degree presence		Street network	L/M	L/M	Araldi and Fusco (2019)
Intensity		Housing units-normalised length		Street network	L/M	L/M	Song and Knaap (2003)
Intensity		Node degree		Street network	L/M	L/M	Boeing (2018a)
Intensity		Normalised number of intersections		Street network	L/M	L/M	Lai et al. (2018)
Intensity		Proportion of 3-way intersections		Street network	L/M	L/M	Boeing (2018a)
Intensity		Proportion of 4-way intersections		Street network	L/M	L/M	Boeing (2018a)
Intensity		Proportions of dead-ends		Street network	L/M	L/M	Boeing (2018a)
Intensity		Streets per node		Street network	L/M	L/M	Boeing (2018a)
Intensity		Normalised length of streets network		Urban area	L/M	L/M	Peponis et al. (2007)
Intensity		Normalised number of blocks		Urban area	L/M	L/M	Peponis et al. (2007)
Intensity		Normalised number of housing units		Urban area	L/M	L/M	Galster (2001)
Intensity		Normalised number of intersections		Urban area	L/M	L/M	Peponis et al. (2007)
Intensity		Normalised number of street network nodes		Urban area	L/M	L/M	Boeing (2018b)
Intensity		Normalised number of street segments		Urban area	L/M	L/M	Boeing (2018a)
Intensity		Number of blocks		Urban area	L/M	L/M	Peponis et al. (2007)
Intensity		Number of intersections		Urban area	L/M	L/M	Boeing (2018a)
Intensity		Number of street segments		Urban area	L/M	L/M	Peponis et al. (2007)
Connectivity	the spatial interconnection of the segments of the networks (usually street networks)	Cyclomatic complexity	of	Pedestrian network	M	M	Bourdic, Salat and Nowacki (2012)
Connectivity		Block accessibility		Street network	S	M	Oliveira (2013)
Connectivity		Accessibility of plots		Street network	S	M	Oliveira (2013)
Connectivity		Accessible plot density		Street network	S	M	Feliciotti (2018)
Connectivity		Connectivity		Street network	M	M	Lowry and Lowry (2014)
Connectivity		External connectivity		Street network	M	M	Song and Knaap (2004)
Connectivity		Internal connectivity		Street network	M	M	Song and Knaap (2004)
Connectivity		Link / Node Ratio		Street network	M	M	Dibble et al. (2017)
Connectivity		Local closeness		Street network	S	M	Feliciotti (2018)
Connectivity		Meshedness		Street network	S	M	Feliciotti (2018)
Connectivity		Redundancy		Street network	S	M	Feliciotti (2018)
Connectivity		Straightness		Street network	S	M	Feliciotti (2018)
Connectivity		Connectivity		Axial map	S	L/M	Hallowell (2013)
Connectivity		Global integration		Axial map	S	L/M	Hallowell (2013)
Connectivity		Local integration		Axial map	S	L/M	Hallowell (2013)
Connectivity		Cyclomatic complexity		Car network	L/M	L/M	Bourdic, Salat and Nowacki (2012)
Connectivity		2 mins driving distance Area		Street network	S	L/M	Schirmer and Axhausen (2015)
Connectivity		Accessibility of buildings		Street network	S	L/M	Schirmer and Axhausen (2015)
Connectivity		Accessibility of floorspace		Street network	S	L/M	Schirmer and Axhausen (2015)
Connectivity		Angular betweenness		Street network	S	L/M	Omer and Kaplan (2018)
Connectivity		Angular betweenness centrality		Street network	S	L/M	Berghauser Pont, M. et al. (2017)
Connectivity		Angular closeness		Street network	S	L/M	Omer and Kaplan (2018)
Connectivity		Average mean maximum gravity		Street network	L/M	L/M	Sevtsuk (2016)
Connectivity		Betweenness centrality		Street network	S	L/M	Porta et al. (2006)
Connectivity		Centrality		Street network	S	L/M	Boeing (2018a)
Connectivity		Closeness centrality		Street network	S	L/M	Porta et al. (2006)
Connectivity		Clustering Coefficient		Street network	L/M	L/M	Boeing (2018a)
Connectivity		Combined betweenness-closeness		Street network	S	L/M	Omer and Kaplan (2018)
Connectivity		Connected Node Ratio		Street network	L/M	L/M	Feliciotti (2018)
Connectivity		Connectivity		Street network	S	L/M	Hillier (various)
Connectivity		Connectivity alpha index		Street network	L/M	L/M	Song and Popkin (2013)
Connectivity		Connectivity beta index		Street network	L/M	L/M	Song and Popkin (2013)
Connectivity		Connectivity cyclomatic index		Street network	L/M	L/M	Song and Popkin (2013)
Connectivity		Connectivity gamma index		Street network	L/M	L/M	Song and Popkin (2013)
Connectivity		Control		Street network	S	L/M	Hillier (various)
Connectivity		Directional distance		Street network	S	L/M	Peponis et al. (2007)
Connectivity		Eigenvector centrality		Street network	S	L/M	Agryzcov et al. (2017)
Connectivity		External connectivity		Street network	L/M	L/M	Song and Knaap (2003)
Connectivity		Gravity		Street network	S	L/M	Sevtsuk and Mekonnen (2012)
Connectivity		Gravity accessibility of Mean Maximum Gravity block		Street network	S	L/M	Sevtsuk (2016)
Connectivity		Gravity achieved		Street network	S	L/M	Sevtsuk (2016)
Connectivity		Choice		Street network	S	L/M	Hausleitner, B. and Berghauser Pont, M. (2017)
Connectivity		Integration		Street network	S	L/M	Hausleitner, B. and Berghauser Pont, M. (2017)
Connectivity		Internal connectivity		Street network	L/M	L/M	Song and Knaap (2003)
Connectivity		Link / Node Ratio		Street network	L/M	L/M	Dill (2004)
Connectivity		Local betweenness		Street network	S	L/M	Gil (2012)
Connectivity		Local closeness		Street network	S	L/M	Gil (2012)
Connectivity		Node connectivity		Street network	L/M	L/M	Boeing (2018b)
Connectivity		Node/edge connectivity		Street network	L/M	L/M	Boeing (2018b)
Connectivity		PageRank		Street network	L/M	L/M	Boeing (2018a)
Connectivity		Reach		Street network	S	L/M	Sevtsuk and Mekonnen (2012)
Connectivity		Self-loop proportion		Street network	L/M	L/M	Boeing (2018a)
Connectivity		Straightness centrality		Street network	S	L/M	Porta et al. (2006)
Connectivity		Total plots required in block frontage to achieve mean maximum gravity (MMG)		Street network	L/M	L/M	Sevtsuk (2016)
Connectivity		Weighted Clustering Coefficient		Street network	L/M	L/M	Boeing (2018a)
Diversity	the variety and richness of the elements and their characteristics in the study area	Block Area Power law distribution	of	Sanctuary Area	M	M	Feliciotti (2018)
Diversity		Interface type Power law distribution		Sanctuary Area	M	M	Feliciotti (2018)
Diversity		Plot Area Heterogeneity (Gini-Simpson)		Sanctuary Area	M	M	Feliciotti (2018)
Diversity		Plot Area Power law distribution		Sanctuary Area	M	M	Feliciotti (2018)
Diversity		Street length power law distribution		Sanctuary Area	M	M	Feliciotti (2018)
Diversity		Intersection proportion		Street network	M	M	Song and Popkin (2013)
Diversity		Dissimilarity index		Tract	S	M	Krizek (2003)
Diversity		Plot area diversity (Simpson's)		Accessible radius	S	L/M	Bobkova, Marcus and Berghauser Pont (2017)
Diversity		Plot Area Diversity		Case study	L/M	L/M	Bourdic, Salat and Nowacki (2012)
Diversity		Block Area Power law distribution		Neighborhood	L/M	L/M	Louf and Barthelemy (2014)
Diversity		Block Shape factor Probaility conditional distribution		Neighborhood	L/M	L/M	Louf and Barthelemy (2014)
Diversity		Diversity index		Street network	L/M	L/M	Agryzkov, Tortosa and Vicent (2018)
Diversity		Scale hierarchy		Street network	L/M	L/M	Bourdic, Salat and Nowacki (2012)
